# Supplementary material for: Severe hypoxia exposure inhibits larval brain development but does not affect the capacity to mount a cortisol stress response in zebrafish
Source: Oxford University Press journal article supplement (doi:10.1242/jeb.243335), 2021-12-21
Supplement: jeb243335supp.pdf [file jeb243335supp.pdf]

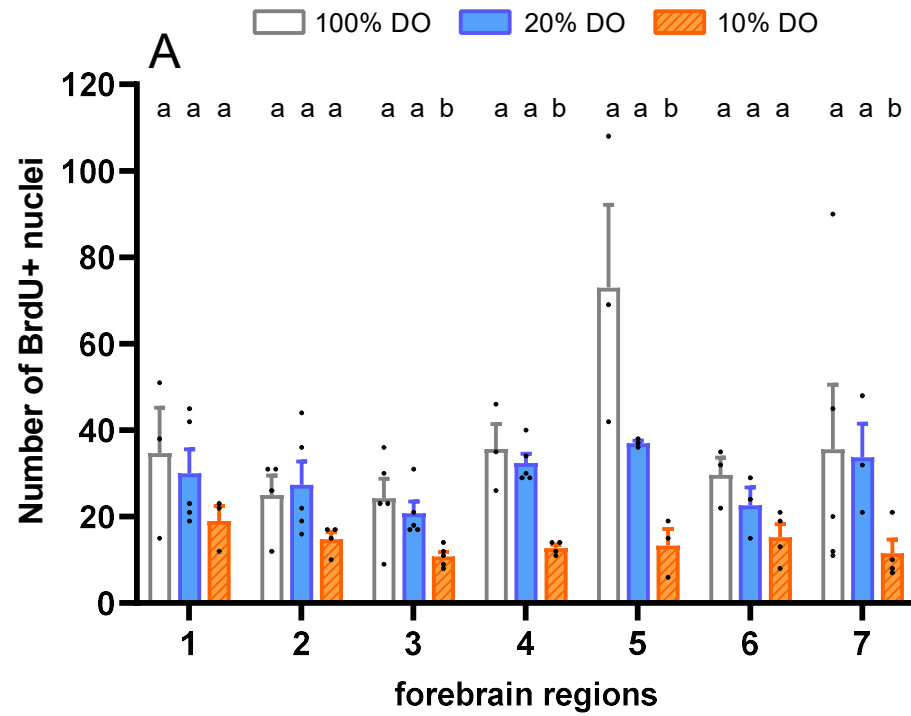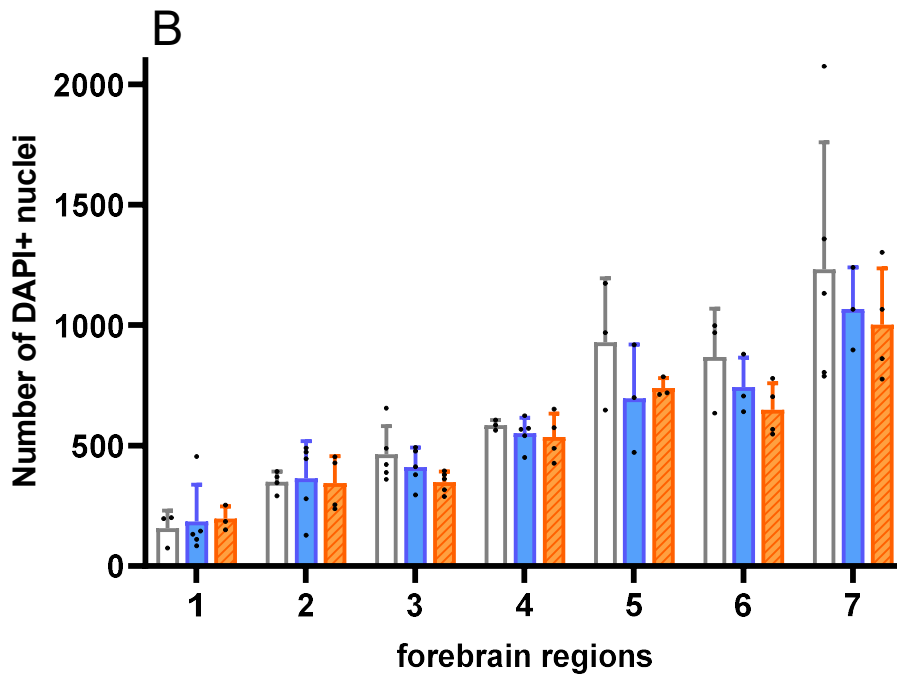

**Fig. S1.** Effects of hypoxia exposure on forebrain proliferation in 5 dpf zebrafish larvae. Larval zebrafish were exposed for 16 h to 100%, 20% or 10% dissolved O<sub>2</sub> (DO) in the presence of bromodeoxyuridine (BrdU) to label dividing cells. (A) Effects of DO saturation levels on the number of BrdU-positive nuclei within seven defined forebrain regions. (B) Effects of DO saturation levels on the number of DAPI-positive nuclei within seven defined forebrain regions. The number of BrdU- and DAPI-positive nuclei were counted on an average of  $2.9 \pm 0.4$  sections (mean  $\pm$  s.e.m) per forebrain region for each larva ( $n=3-5$  larvae per treatment). Statistical differences between values were determined by two-way ANOVA followed by a Holm-Sidak test for multiple comparison ( $P<0.05$ ). Differences between treatments within a given forebrain region are indicated by different letters. The seven forebrain regions used for BrdU quantification along the rostral to caudal axis included: 1) olfactory bulb; 2) pallium and subpallium; 3) pallium, subpallium, and anterior commissure; 4) pallium, ventral thalamus, preoptic region; 5) habenula, dorsal thalamus, ventral thalamus, and preoptic region; 6) habenula, dorsal thalamus, ventral thalamus, and rostral hypothalamus; 7) torus longitudinalis, pretectum, dorsal thalamus, ventral thalamus, posterior tuberculum, and rostral hypothalamus. See Figure 2 and Result section for further details. Values are means + s.e.m.

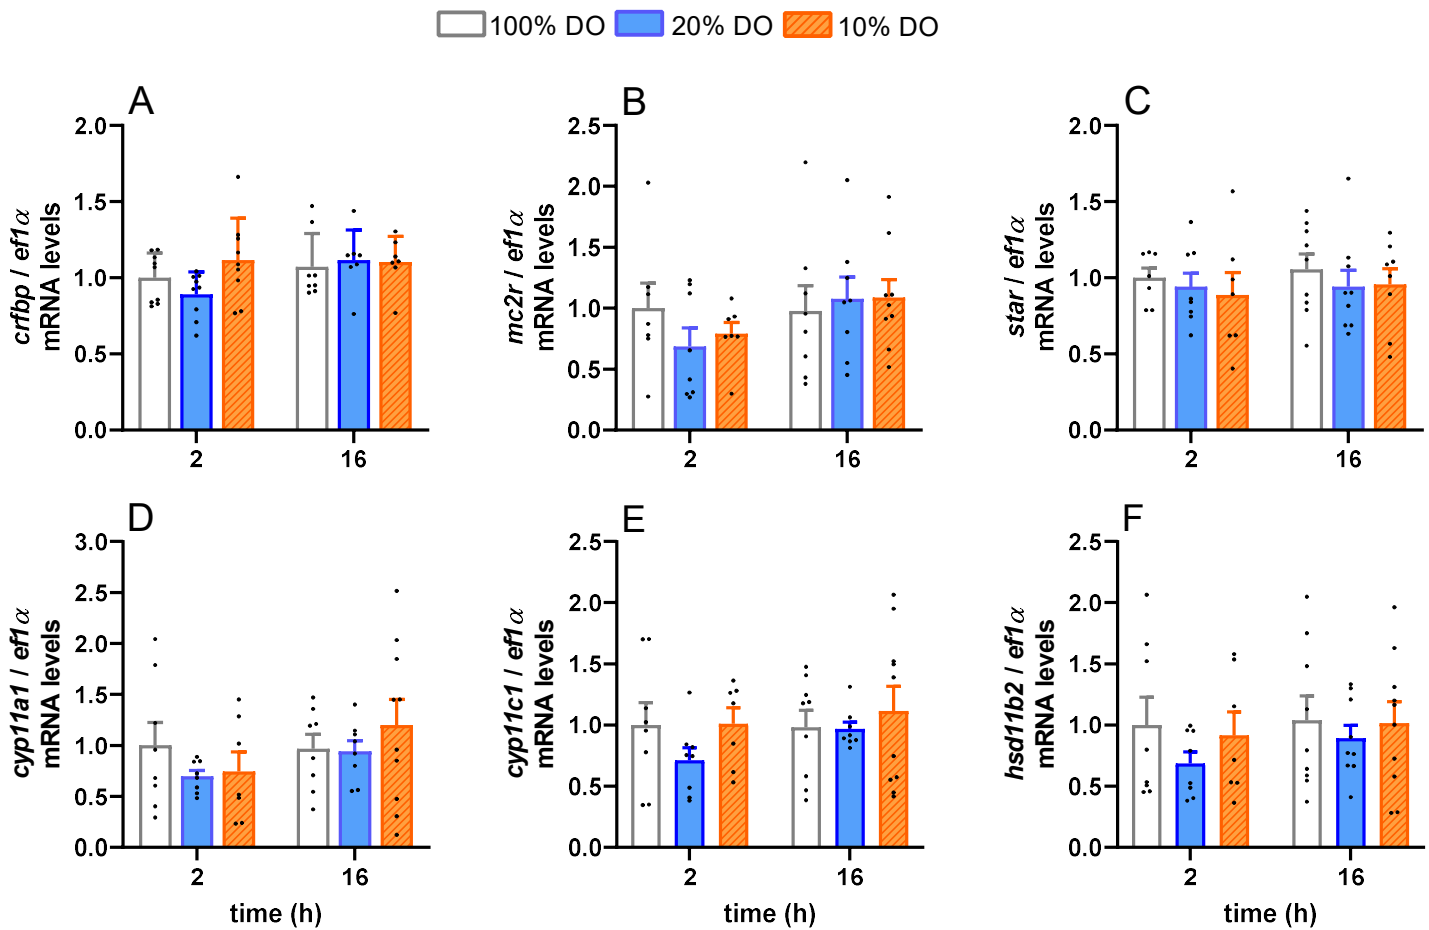

**Fig. S2.** Effects of exposing 5 dpf zebrafish larvae for a 2 or 16 h period to 100%, 20% or 10% dissolved O<sub>2</sub> (DO) saturation levels on the mRNA levels of corticotropin-releasing factor binding protein (*crfbp*; A), melanocortin 2 receptor (*mc2r*; B), steroidogenic acute regulatory protein (*star*; C), cytochrome P450 side-chain cleavage (*cyp11a1*; D), 11 $\beta$ -hydroxylase (*cyp11c1*; E), and 11 $\beta$ -hydroxysteroid dehydrogenase 2 (*hsd11b2*; F). Gene expression is normalized to the *ef1 $\alpha$*  and is expressed relative to the 2 h 100% DO treatment. A two-way ANOVA was performed to determine the effects of time and O<sub>2</sub> treatment on the mRNA levels of each gene. No statistical difference was observed ( $P > 0.05$ ). Values are means + s.e.m. ( $n = 7-10$ ).
